# Supplementary figures and images for: Novel adverse outcome pathways revealed by chemical genetics in a developing marine fish
Source: eLife journal article supplement (doi:10.7554/elife.20707), 2017-01-24

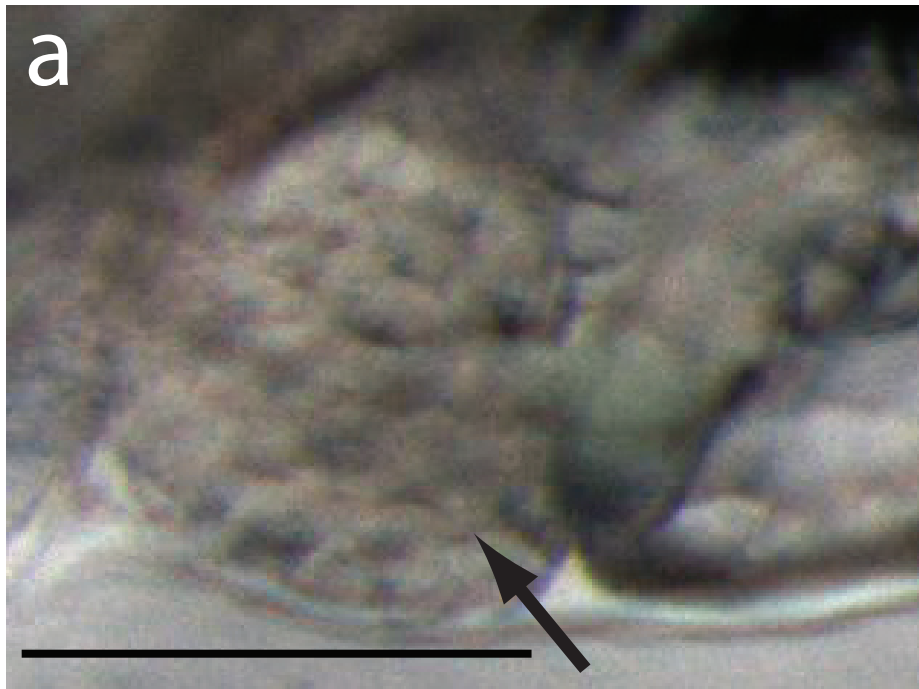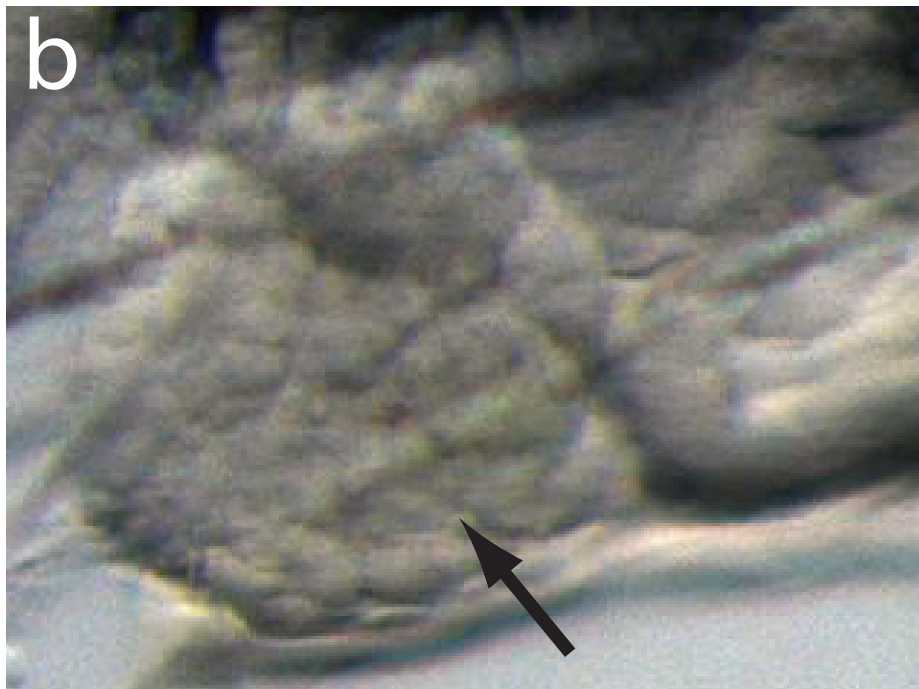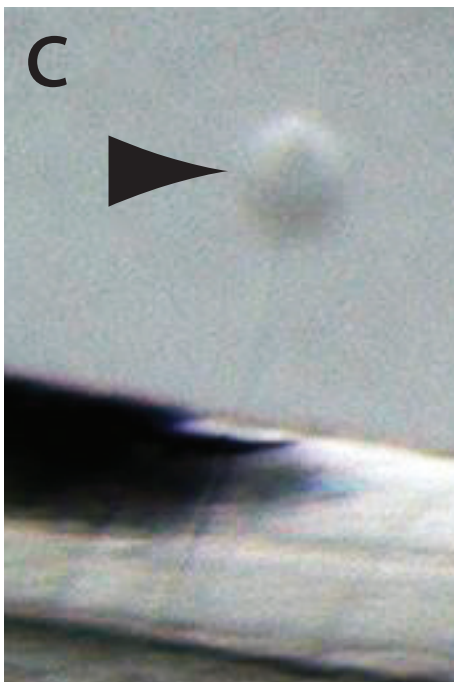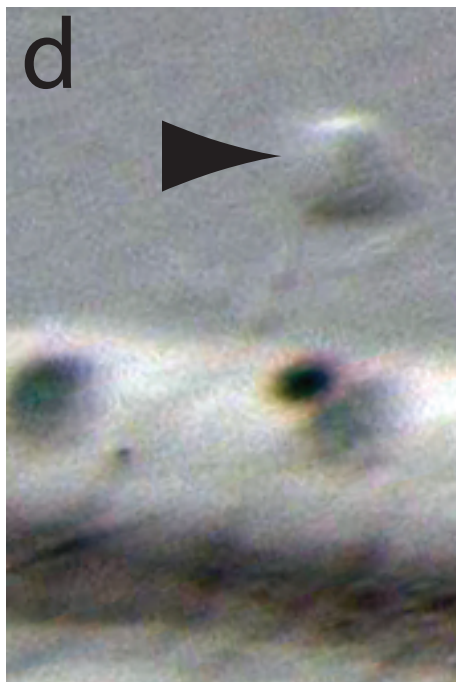

Supplement: supp [file elife_poa_e20707_Figure_1_figure_supplement_1.pdf › elife_poa_e20707_Figure_1_figure_supplement_1.pdf]
